# Supplementary material for: A Multidisciplinary Evaluation of Spatial Heterogeneity in the Puquios of the Salar de Llamara, Atacama Desert, Northern Chile
Source: Research Square preprint supplement (doi:10.21203/rs.3.rs-153999/v1), 2021-02-01
Supplement: Supplementary file 1 [file 64d8a8386bae043e676e4ac1.xlsx]

## Sheet: Sheet1
Surface		Puquio 1	Transition Zone	Puquio 2	P2 Peripheral Lagoons/ Island	Puquio 3	P3 Peripheral Lagoons	Puquio 4	P4 Peripheral Lagoons
Minimum (mS/cm)		14.1	27.9	150	72.2	24	6.2	147.7	26.9
Maximum (mS/cm)		46.9	158.8	156.8	161.7	71.2	95.8	153	164.9
Average (mS/cm)		29.7	64.7	155.7	146.2	51.5	46.3	150.8	85.5
St. Deviation (mS/cm)		6.6	30.9	1.2	21.5	8.1	23.8	1.3	40.4
n		60	433	74	22	47	46	33	79
Bottom
Minimum (mS/cm)		29.9	31.8	145.7	114.2	39	21.5	136.5	28.3
Maximum (mS/cm)		37.5	161.1	157.7	161.4	56.6	88.1	138.5	137.3
Average (mS/cm)		33.5	84.7	154.9	150.2	48	51.7	137.5	84
St. Deviation (mS/cm)		1.8	39.5	2.1	14.2	2.9	15	0.5	34
n		22	297	78	15	32	14	35	13
Stratification		Normal	Variable	Normal	Normal	Mixed?	Normal	Inverse	Mixed
