# Supplementary material for: A Multidisciplinary Evaluation of Spatial Heterogeneity in the Puquios of the Salar de Llamara, Atacama Desert, Northern Chile
Source: Research Square preprint supplement (doi:10.21203/rs.3.rs-153999/v1), 2021-02-01
Supplement: Supplementary file 2 [file d8584d121bdb002f909953c1.xlsx]

## Sheet: Sheet1
	Main Bottom Type	Mineralogy	Microbial Influence
Puquio 1	Floccules with gypsum in mats around the margins	Gypsum	Microbial
		(fine-grained/granular)
Transition Zone	Various microbial mats	Gypsum	Microbial
		(granular to laminated)
Puquio 2	Spar	Gypsum	Physicochemical with microbial influence around the margins
		(selenite crystals)
Puquio 3	Pinnacles	Gypsum	Microbial and physicochemical
Puquio 4	Spar	Gypsum	Physicochemical
		(selenite crystals)
